# Supplementary material for: Heteropolyhedral silver compounds containing the polydentate ligandN,N,O-E-[6-(hydroxyimino)ethyl]-1,3,7-trimethyllumazine. Preparation, spectral and XRD structural study and AIM calculations
Source: Royal Society of Chemistry journal article supplement (doi:10.1039/c2dt32044d), 2012-10-03
Supplement: c2dt32044d.pdf [file c2dt32044d.pdf]

Table S1  
Geometrical features for long-distance interactions.

| Hydrogen bonds D-H···A                                                                                                                                  | D···A (Å)                                      | H···A (Å)    | ∠D-H···A      |       |       |
|---------------------------------------------------------------------------------------------------------------------------------------------------------|------------------------------------------------|--------------|---------------|-------|-------|
| <i>DLMAceMOx</i>                                                                                                                                        |                                                |              |               |       |       |
| O61-H···O2 (1+x, y, z)                                                                                                                                  | 2.744(4)                                       | 1.78(7)      | 154(6)        |       |       |
| <i>[Ag<sub>2</sub>(DLMAceMOx)<sub>2</sub>(NO<sub>3</sub>)<sub>2</sub>]</i>                                                                              |                                                |              |               |       |       |
| O61A···O2B (1-x, -y, -z)                                                                                                                                | 2.840(5)                                       |              |               |       |       |
| O61B···O1N                                                                                                                                              | 2.557(5)                                       |              |               |       |       |
| O61A···O5N                                                                                                                                              | 2.732(5)                                       |              |               |       |       |
| <i>[Ag<sub>2</sub>(DLMAceMOx)<sub>2</sub>(ClO<sub>4</sub>)<sub>2</sub>]</i>                                                                             |                                                |              |               |       |       |
| O61A···O61A (1-x, 2-y, 1-z)                                                                                                                             | 3.02(1)                                        |              |               |       |       |
| O61B···O61B (-x, 2-y, -z)                                                                                                                               | 2.95(1)                                        |              |               |       |       |
| O61A···O7P                                                                                                                                              | 2.70(1)                                        |              |               |       |       |
| O61B···O2P                                                                                                                                              | 2.65(1)                                        |              |               |       |       |
| <i>[Ag<sub>2</sub>(DLMAceMOx)<sub>2</sub>(CF<sub>3</sub>SO<sub>3</sub>)<sub>2</sub>(CH<sub>3</sub>CH<sub>2</sub>OH)]·CH<sub>3</sub>CH<sub>2</sub>OH</i> |                                                |              |               |       |       |
| O1R···O2X ( <sup>3</sup> / <sub>2</sub> -x, - <sup>1</sup> / <sub>2</sub> +y, <sup>1</sup> / <sub>2</sub> -z)                                           | 2.775(7)                                       |              |               |       |       |
| O1S···O1S (1-x, 2-y, 1-z)                                                                                                                               | 2.83(1)                                        |              |               |       |       |
| O61A···F3X                                                                                                                                              | 3.142(7)                                       |              |               |       |       |
| O61A···O1X                                                                                                                                              | 2.707(5)                                       |              |               |       |       |
| O61B···O2Y                                                                                                                                              | 2.672(6)                                       |              |               |       |       |
| Ring···ring π-interactions                                                                                                                              | <i>d</i> (c <sub>1</sub> -c <sub>2</sub> ) (Å) | Slippage (Å) | α (°)         | β (°) | γ (°) |
| <i>DLMAceMOx</i>                                                                                                                                        |                                                |              |               |       |       |
| pym···pym (1-x,-y,1-z)                                                                                                                                  | 3.666(3)                                       | 1.305        | 0.0           | 20.8  | 20.8  |
| pyz··· pym (1-x,-y,1-z)                                                                                                                                 | 3.614(3)                                       | 1.147        | 2.1           | 18.5  | 20.3  |
| pyz···pyz (1-x,-1-y,1-z)                                                                                                                                | 3.736(3)                                       | 1.549        | 0.0           | 24.5  | 24.5  |
| <i>[Ag<sub>2</sub>(DLMAceMOx)<sub>2</sub>(NO<sub>3</sub>)<sub>2</sub>]</i>                                                                              |                                                |              |               |       |       |
| pymB···pymB (1-x,-y,-z)                                                                                                                                 | 3.337(3)                                       | 1.184        | 0.0           | 20.8  | 20.8  |
| <i>[Ag(DLMAceMOx)<sub>2</sub>]BF<sub>4</sub></i>                                                                                                        |                                                |              |               |       |       |
| pymA···pymA (1-x,1-y,-z)                                                                                                                                | 3.824(4)                                       | 1.764        | 0.0           | 27.5  | 27.5  |
| Y-X···ring π-interactions                                                                                                                               | <i>d</i> (X···Cg) (Å)                          | δ (°)        | ∠Y-X···Cg (°) |       |       |
| <i>DLMAceMOx</i>                                                                                                                                        |                                                |              |               |       |       |
| C2-O2···pyz (1-x,-y,1-z)                                                                                                                                | 3.610(3)                                       | 24.5         | 69.6(2)       |       |       |
| <i>[Ag<sub>2</sub>(DLMAceMOx)<sub>2</sub>(NO<sub>3</sub>)<sub>2</sub>]</i>                                                                              |                                                |              |               |       |       |
| C2A-O2A···pymB (2-x, <sup>1</sup> / <sub>2</sub> +y, <sup>1</sup> / <sub>2</sub> -z)                                                                    | 2.662(4)                                       | 4.2          | 167.2(4)      |       |       |
| N1N-O1N···pyzA                                                                                                                                          | 2.993(4)                                       | 2.0          | 104.9(3)      |       |       |
| N61B-O61B···chelA                                                                                                                                       | 3.448(4)                                       | 9.4          | 71.3(3)       |       |       |
| <i>[Ag<sub>2</sub>(DLMAceMOx)<sub>2</sub>(ClO<sub>4</sub>)<sub>2</sub>]</i>                                                                             |                                                |              |               |       |       |
| Cl1-O4P···chelA (-x, - <sup>1</sup> / <sub>2</sub> +y, <sup>1</sup> / <sub>2</sub> -z)                                                                  | 2.67(1)                                        | 9.3          | 110.4(6)      |       |       |
| Cl2-O6P···pymB (1-x, - <sup>1</sup> / <sub>2</sub> +y, <sup>1</sup> / <sub>2</sub> -z)                                                                  | 3.01(1)                                        | 3.0          | 103.8(5)      |       |       |
| Cl2-O8P···pyzB (1-x, - <sup>1</sup> / <sub>2</sub> +y, <sup>1</sup> / <sub>2</sub> -z)                                                                  | 2.90(1)                                        | 4.6          | 114.3(5)      |       |       |
| Cl2-O7P···pymB                                                                                                                                          | 3.29(1)                                        | 28.9         | 162.3(6)      |       |       |
| Cl2-O7P···pyzB                                                                                                                                          | 2.95(1)                                        | 15.2         | 121.7(5)      |       |       |
| N61A-O61A···chelB                                                                                                                                       | 3.37(1)                                        | 13.6         | 76.8(6)       |       |       |
| N61B-O61B···chelA                                                                                                                                       | 3.40(1)                                        | 24.9         | 71.4(6)       |       |       |
| <i>[Ag<sub>2</sub>(DLMAceMOx)<sub>2</sub>(CF<sub>3</sub>SO<sub>3</sub>)<sub>2</sub>(CH<sub>3</sub>CH<sub>2</sub>OH)]·CH<sub>3</sub>CH<sub>2</sub>OH</i> |                                                |              |               |       |       |
| C1X-F1X···pyzB ( <sup>3</sup> / <sub>2</sub> -x, <sup>1</sup> / <sub>2</sub> +y, <sup>1</sup> / <sub>2</sub> -z)                                        | 3.631(6)                                       | 21.1         | 90.8(5)       |       |       |
| C1Y-F2Y···pyzA ( <sup>1</sup> / <sub>2</sub> -x, <sup>1</sup> / <sub>2</sub> +y, <sup>1</sup> / <sub>2</sub> -z)                                        | 3.052(4)                                       | 8.1          | 139.8(3)      |       |       |
| C1X-F2X···pyzB ( <sup>3</sup> / <sub>2</sub> -x, <sup>1</sup> / <sub>2</sub> +y, <sup>1</sup> / <sub>2</sub> -z)                                        | 3.258(6)                                       | 22.2         | 107.4(5)      |       |       |
| S1Y-O3Y···pymA ( <sup>1</sup> / <sub>2</sub> -x, <sup>1</sup> / <sub>2</sub> +y, <sup>1</sup> / <sub>2</sub> -z)                                        | 3.013(5)                                       | 4.9          | 126.4(3)      |       |       |
| S1X-O3X···pymB ( <sup>3</sup> / <sub>2</sub> -x, <sup>1</sup> / <sub>2</sub> +y, <sup>1</sup> / <sub>2</sub> -z)                                        | 2.863(5)                                       | 8.8          | 161.0(4)      |       |       |
| S1Y-O2Y···pyzA                                                                                                                                          | 3.006(5)                                       | 8.4          | 116.8(2)      |       |       |

|                                                                                                                                                         |               |              |          |
|---------------------------------------------------------------------------------------------------------------------------------------------------------|---------------|--------------|----------|
| S1X-O2X...pymB                                                                                                                                          | 2.933(5)      | 14.5         | 136.7(3) |
| S1X-O2X...pyzB                                                                                                                                          | 3.246(5)      | 28.5         | 128.7(3) |
| N61B-O61B...chelA                                                                                                                                       | 3.288(4)      | 13.9         | 74.1(2)  |
| N61B-O61B...pymA                                                                                                                                        | 3.675(5)      | 29.8         | 111.7(3) |
| <i>[Ag(DLMAceMOx)<sub>2</sub>](BF<sub>4</sub>)</i>                                                                                                      |               |              |          |
| B1-F1...pymB                                                                                                                                            | 3.191(6)      | 22.5         | 86.8(5)  |
| B1-F2...pymB                                                                                                                                            | 3.417(6)      | 29.0         | 78.4(5)  |
| B1-F2...pyzB                                                                                                                                            | 3.067(6)      | 14.6         | 115.6(5) |
| B1-F3...pymA                                                                                                                                            | 2.809(6)      | 5.0          | 132.1(5) |
| B1-F3...pymB                                                                                                                                            | 3.074(6)      | 21.4         | 91.8(5)  |
| C4B-O4B...pyzA                                                                                                                                          | 2.986(6)      | 19.6         | 131.1(5) |
| Metal...ring $\pi$ -interactions                                                                                                                        | d(Ag...Cg)(Å) | $\delta$ (°) |          |
| <i>[Ag<sub>2</sub>(DLMAceMOx)<sub>2</sub>(NO<sub>3</sub>)<sub>2</sub>]</i>                                                                              |               |              |          |
| Ag2...chelA                                                                                                                                             | 3.651         | 43.66        |          |
| <i>[Ag<sub>2</sub>(DLMAceMOx)<sub>2</sub>(ClO<sub>4</sub>)<sub>2</sub>]</i>                                                                             |               |              |          |
| Ag2...chelA                                                                                                                                             | 3.294         | 34.4         |          |
| Ag2...chelB                                                                                                                                             | 3.644         | 42.7         |          |
| Ag2...pyzB                                                                                                                                              | 3.738         | 42.3         |          |
| <i>[Ag<sub>2</sub>(DLMAceMOx)<sub>2</sub>(CF<sub>3</sub>SO<sub>3</sub>)<sub>2</sub>(CH<sub>3</sub>CH<sub>2</sub>OH)·CH<sub>3</sub>CH<sub>2</sub>OH]</i> |               |              |          |
| Ag2...chelA                                                                                                                                             | 3.502         | 42.0         |          |

Rings are labelled as follows: pym: N1-C2-N3-C4-C4A-C8A; pyz: N5-C6-C7-N8-C8A-C4A; pymA: N1A-C2A-N3A-C4A-C4AA-C8AA; pymB: N1B-C2B-N3B-C4B-C4AB-C8AB; pyzA: N5A-C6A-C7A-N8A-C8AA-C4AA; pyzB: N5B-C6B-C7B-N8B-C8AB-C4AB; chelA: Ag1-O4A-C4A-C4AA-N5A; chelB: Ag1-O4B-C4B-C4AB-N5B. d(c<sub>1</sub>-c<sub>2</sub>): distance between centroids of rings involved in  $\pi$ -interactions (only those <4 Å are given);  $\alpha$ : angle between planes;  $\beta$  and  $\gamma$ : slipping angles between the centroid-centroid vector and the normal to each stacked ring plane; d(X...Cg): distance between the X atom and the centroid of the ring;  $\delta$ : slipping angle between the X-centroid vector and the normal to the ring.
